# Supplementary material
Source: Springer Nature journal article supplement (https://www.springermedizin.de/resource/supplementary/12891_2009_795_MOESM1_ESM.pdf/9507032)

Number of cases presenting with a light fall,  
pain, or a car accident

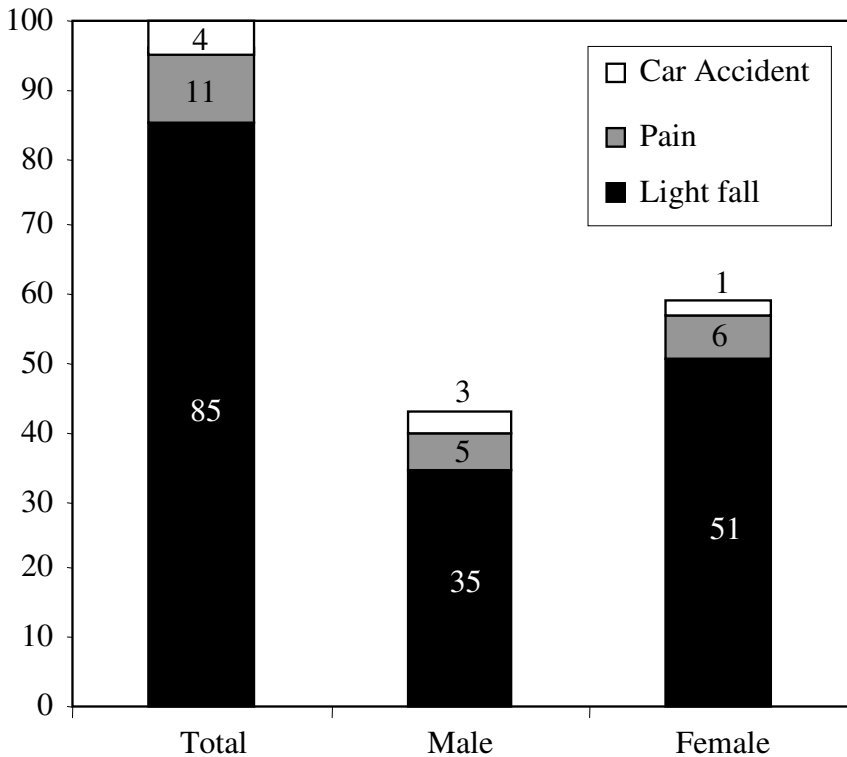

Supplement: MOESM1 [file 9507032]
